# Supplementary figures and images for: Comprehensive Sequence Analysis of IQD Gene Family and their Expression Profiling in Grapevine (Vitis vinifera)
Source: MDPI journal article supplement (doi:10.3390/genes11020235), 2020-02-24

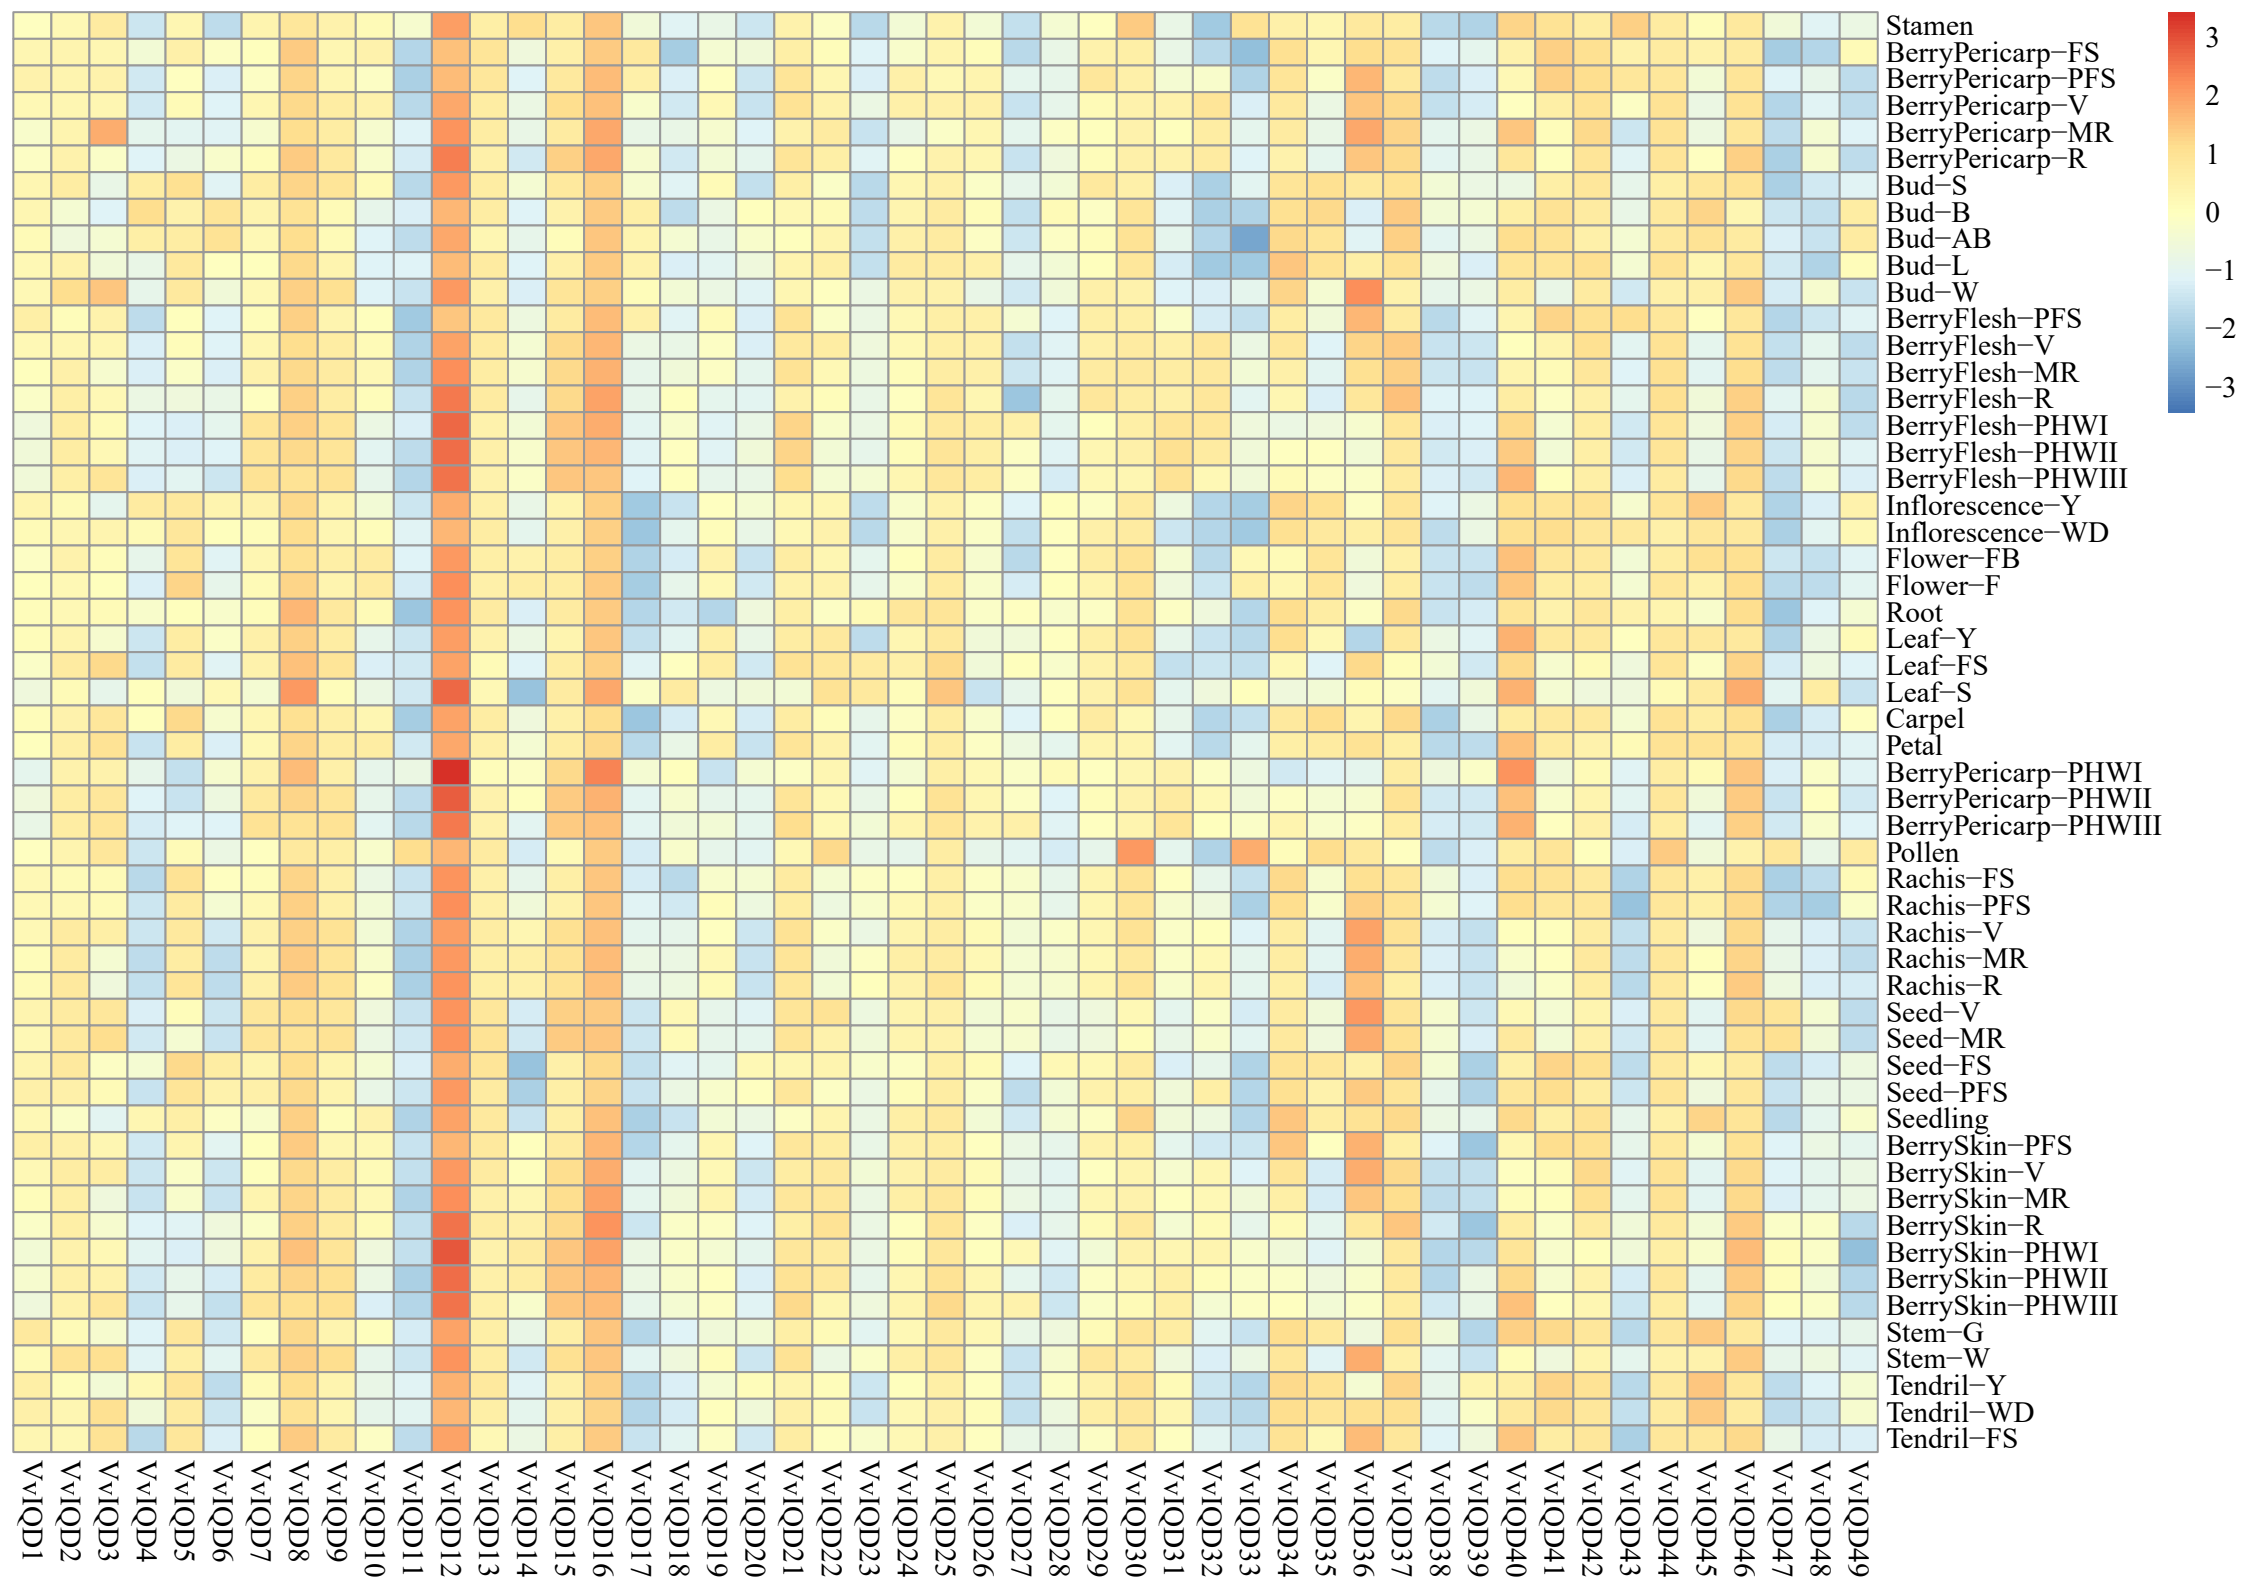

Supplement: s1 [file s1]
